# Supplementary material for: Antireflective silica nanoparticle array directly deposited on flexible polymer substrates by chemical vapor deposition
Source: Royal Society of Chemistry journal article supplement (doi:10.1039/c2nr32381h), 2012-01-01
Supplement: c2nr32381h.pdf [file c2nr32381h.pdf]

## Supplementary Information

### **Antireflective Silica Nanoparticle Array Directly Deposited on Flexible Polymer Substrates by Chemical Vapor Deposition**

*Jungheum Yun,<sup>\*a</sup> Tae-Sung Bae,<sup>b</sup> Jung-Dae Kwon,<sup>a</sup> Sunghun Lee<sup>c</sup> and Gun-Hwan Lee<sup>c</sup>*

<sup>a</sup>Advanced Functional Thin Film Department and <sup>c</sup>Plasma Coating Technology Department, Korea Institute of Materials Science, Changwon, Gyeongnam 641-831, Republic of Korea

<sup>b</sup>Korea Basic Science Institute, Jeonju, Jeonbuk 561-180, Republic of Korea

\*correspondence to [jungheum@kims.re.kr](mailto:jungheum@kims.re.kr)

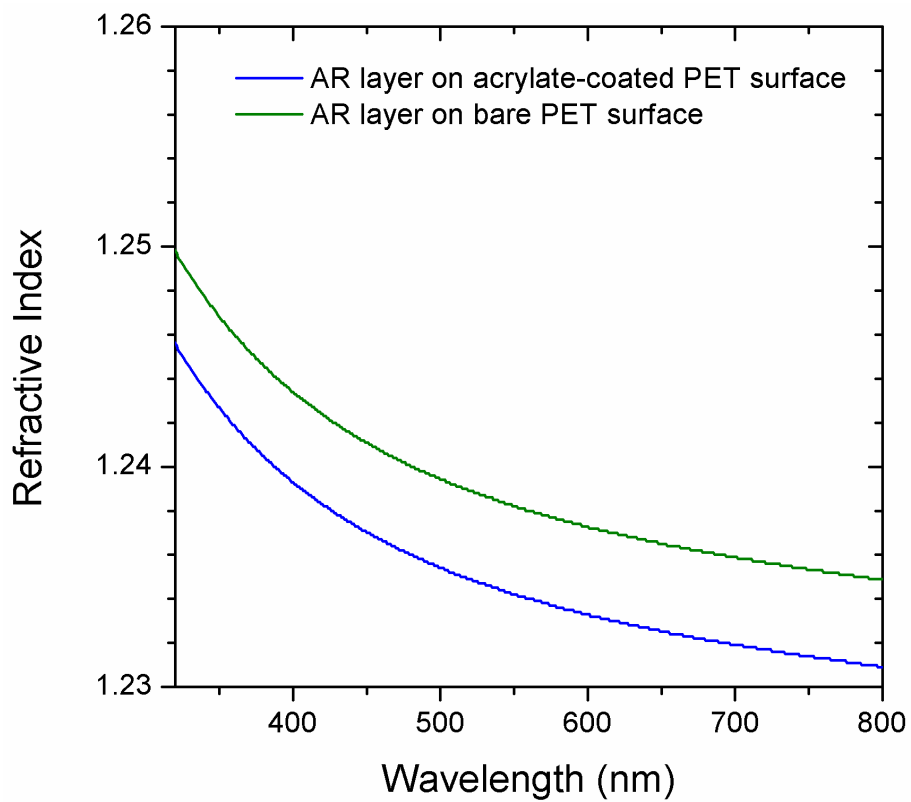

**Fig. S1** Refractive indices of 90 nm-thick silica nanoparticle AR layers coated on acrylate and bare PET surfaces pretreated for 3 min.

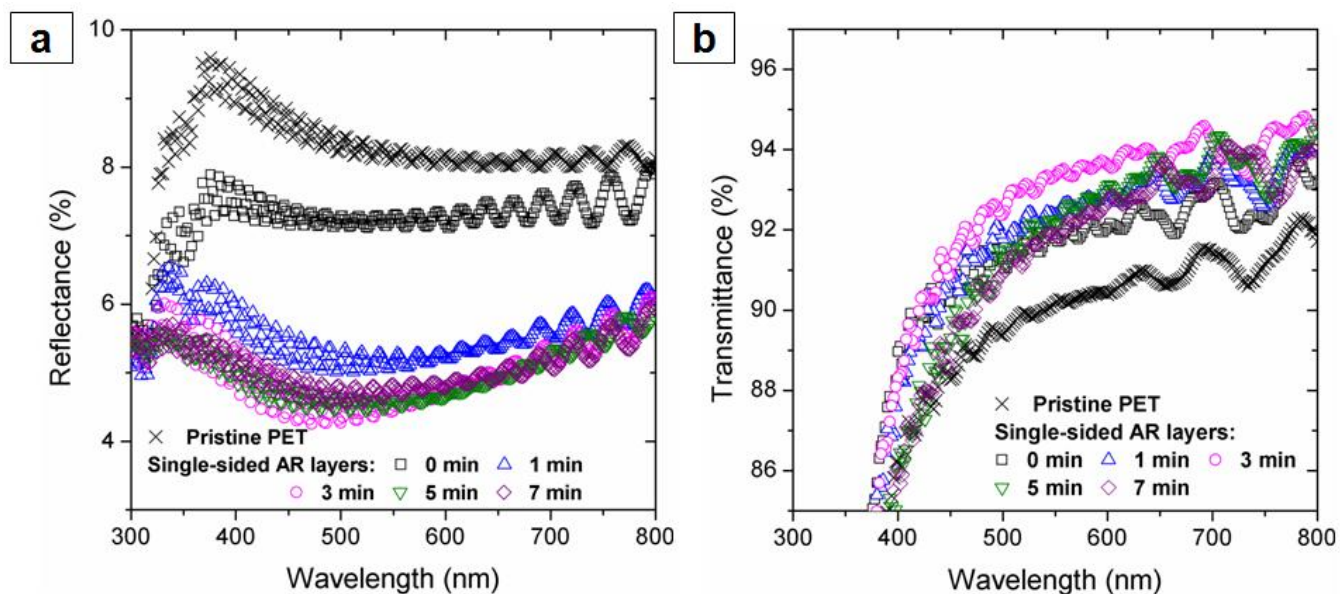

**Fig. S2** (a) Specular reflection and (b) transmission spectra of 90 nm-thick silica nanoparticle AR layers coated on bare PET surfaces pretreated for different times. The bare PET surfaces were treatment time

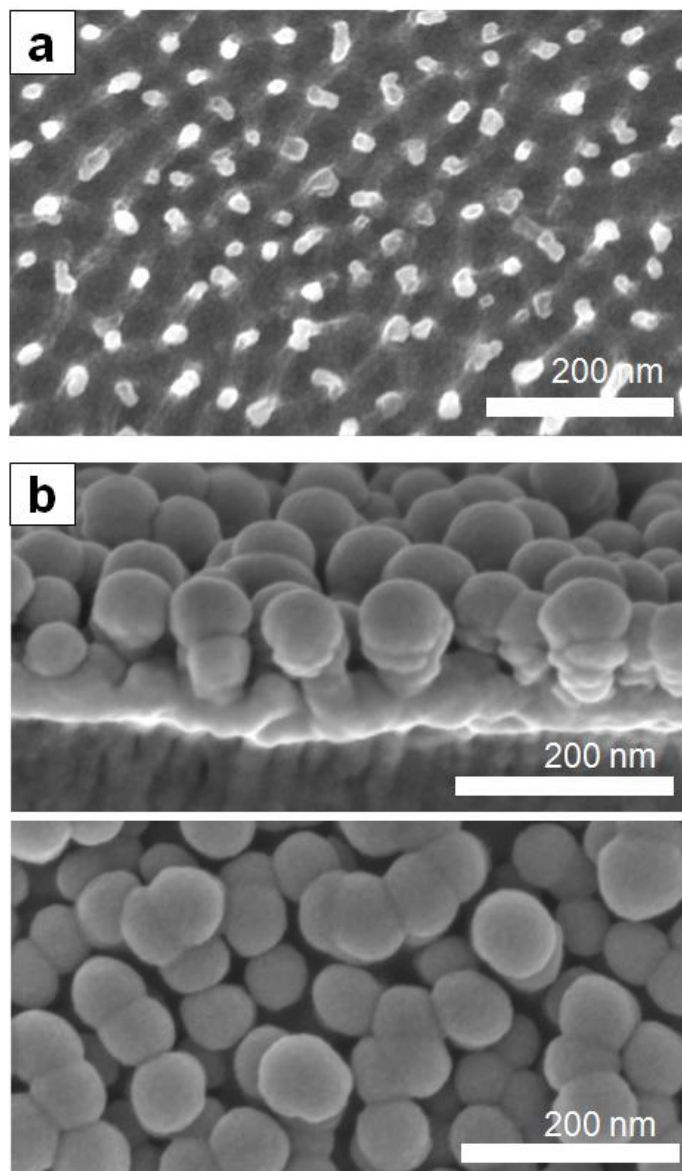

**Fig. S3** FE-SEM images of (a) polymer protrusions developed on a 3 min-treated bare PET surface and (b) 90 nm-thick silica nanoparticles coated subsequently on the bare PET surface.

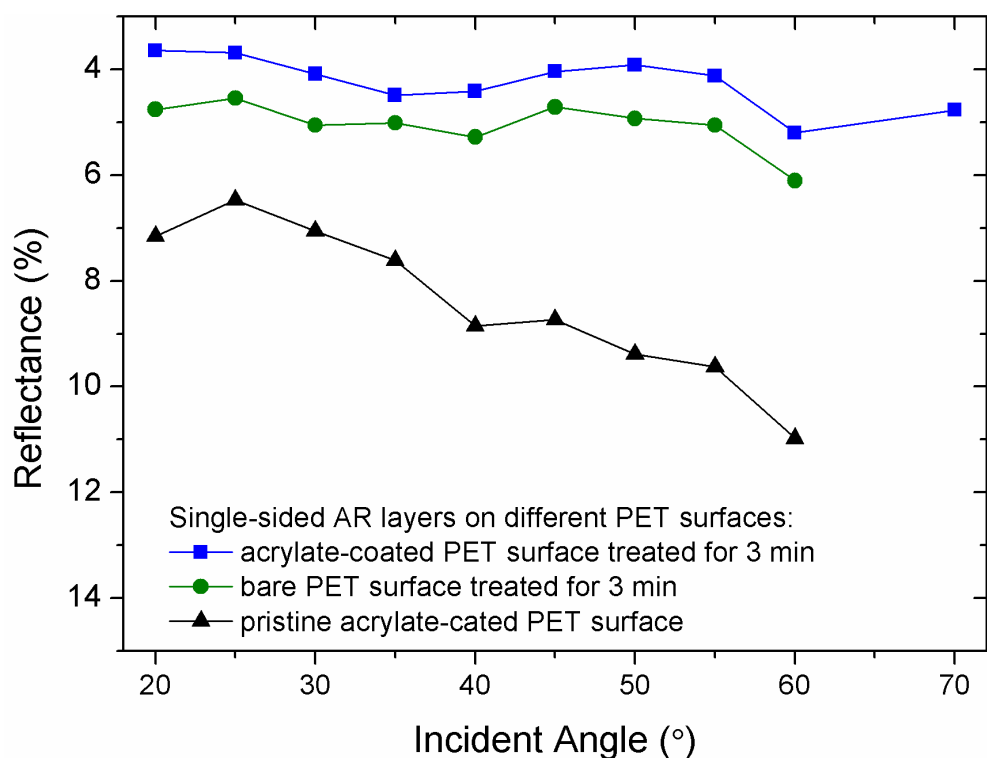

**Fig. S4** Effects of the angle of incidence at a wavelength of 600 nm on the AR characteristics of PET substrates overcoated with 90 nm-thick silica nanoparticle AR layers. The AR layers were coated on three different PET surfaces: (i) an acrylate-coated PET surface that was plasma-treated for 3 min, (ii) a bare PET surface that was plasma-treated for 3 min, and (iii) a pristine acrylate-coated PET surface without any plasma pretreatment.

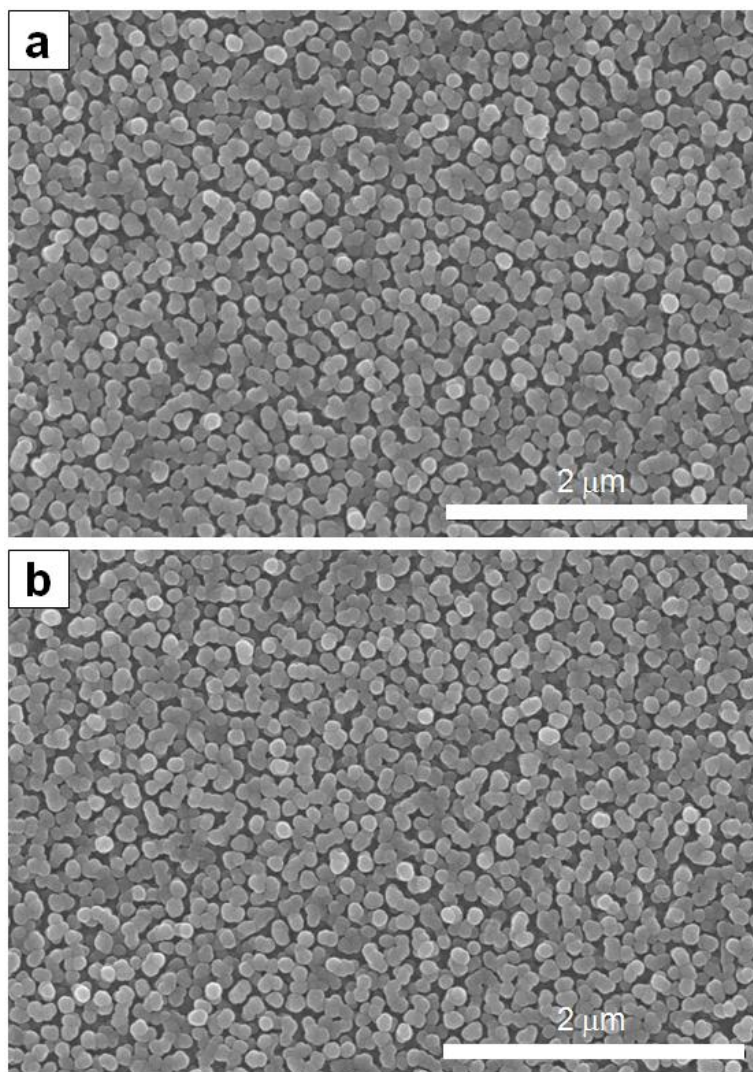

**Fig. S5** FE-SEM images of a 90 nm-thick silica nanoparticle AR layer coated on an acrylate-coated PET surface that was plasma-treated for 3 min (a) before and (b) after exposing the AR layer to 3000 cycles of curvature-imposed tensile strain.
